# Supplementary material for: KLF4 Nuclear Export Requires ERK Activation and Initiates Exit from Naive Pluripotency
Source: PubMed Central journal article supplement — Stem Cell Reports. 2018 Mar 8;10(4):1308–23. doi: 10.1016/j.stemcr.2018.02.007 (PMC6000723; doi:10.1016/j.stemcr.2018.02.007), 2018-03-08
Supplement: mmc1.pdf [file mmc1.pdf]

**Stem Cell Reports, Volume 10**

**Supplemental Information**

**KLF4 Nuclear Export Requires ERK Activation and Initiates Exit from  
Naive Pluripotency**

**Navroop K. Dhaliwal, Kamelia Miri, Scott Davidson, Hala Tamim El Jarkass, and Jennifer  
A. Mitchell**

## **Inventory of Supplemental Information**

Figure S1: Changes in pluripotency factor mRNA and protein levels during the first 24hr of differentiation. Related to Figure 1.

Figure S2: Changes in nuclear protein complexes associated with pluripotency exit. Related to Figure 2.

Figure S3: Signaling mechanisms regulating KLF4 nuclear export. Related to Figure 3.

Figure S4: KLF4 interacts with XPO1 independently of MEK. Related to Figure 4.

Figure S5: Supplemental data related to Figure 5.

Figure S6: Expression of KLF4(S132A) blocks ES cell differentiation. Related to Figure 6.

Figure S7: Proximity ligation amplification and immunostaining controls in mouse embryos. Related to Figure 7.

Table S1: Antibody list

Table S2: Primer list

Table S3: Site directed mutagenesis primer list

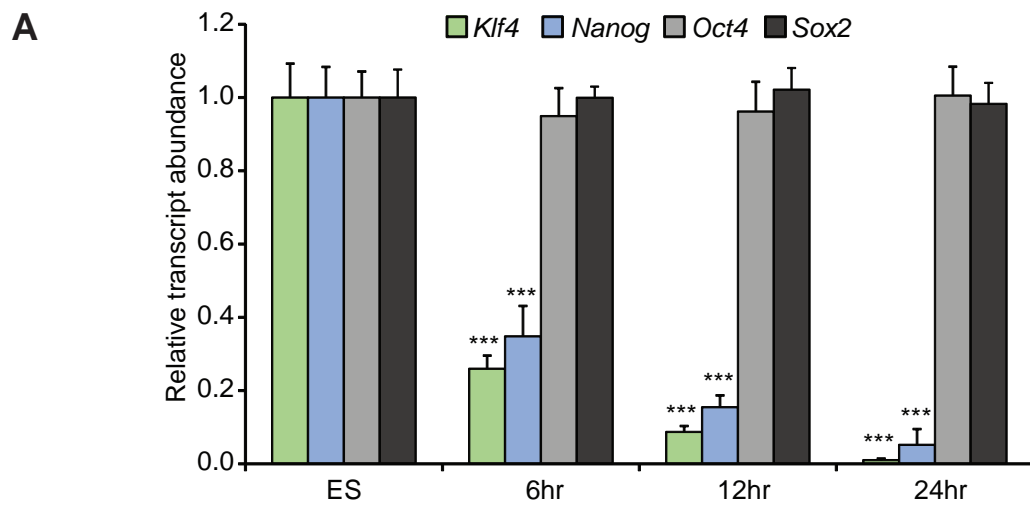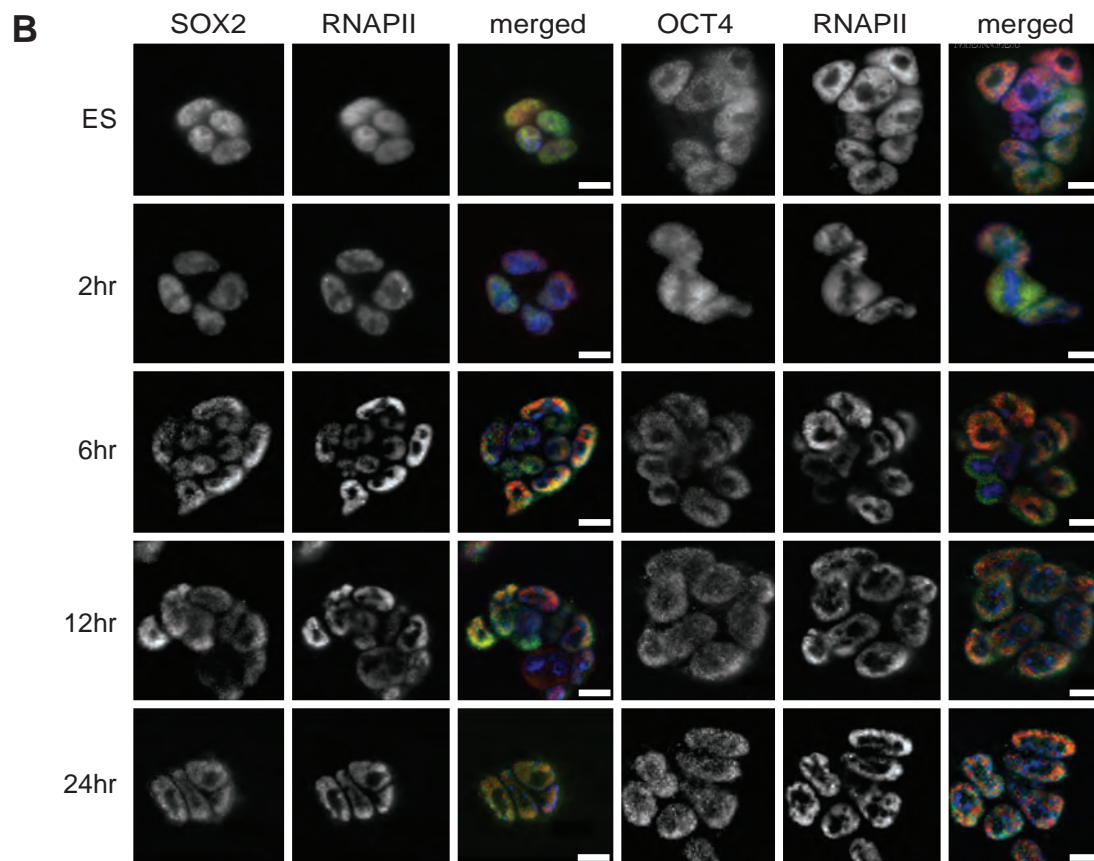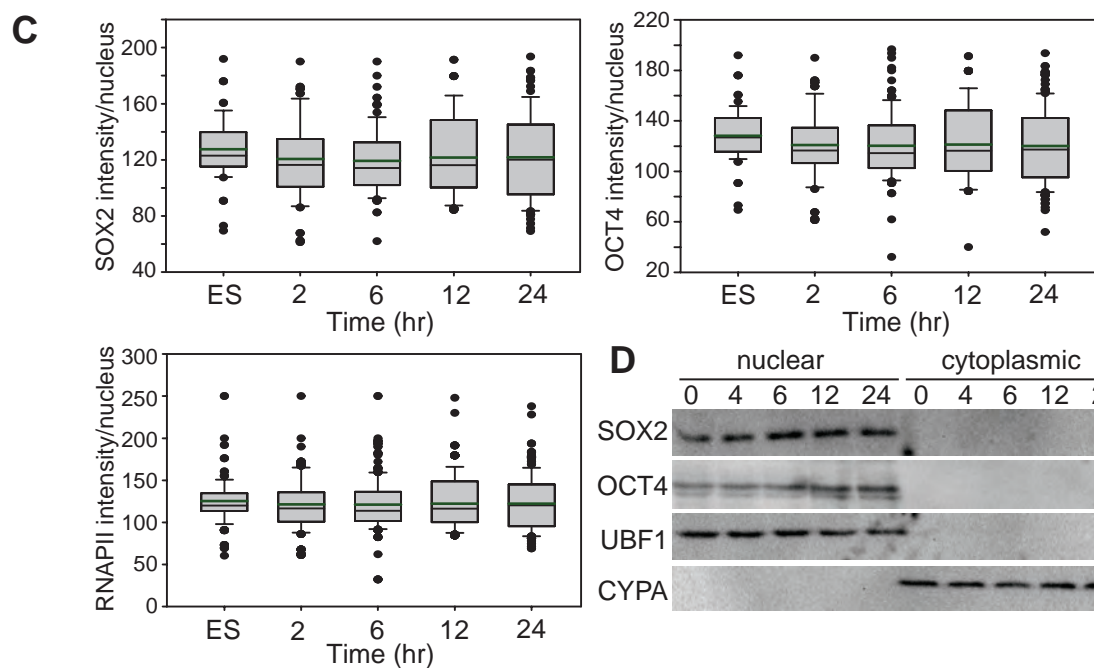

**Figure S1: Changes in pluripotency factor mRNA and protein levels during the first 24hr of differentiation. Related to Figure 1.** A) Real time RT-qPCR from three biological replicate samples reveals downregulation of *Klf4* and *Nanog* mRNA 6hr after LIF/2i withdrawal. Statistical differences are indicated by \*\*\*  $P < 0.001$ . Error bars represent standard deviation. B) Immunofluorescence images of ES cells cultured with LIF/2i and ES cells 2, 6, 12 and 24hr after LIF/2i removal. OCT4, SOX2, and RNAPII-S5P proteins were detected by immunofluorescence. Merged images display SOX2 or OCT4 in green, RNAPII-S5P in red and DAPI DNA stain in blue. Scale bar = 10 $\mu$ m. C) Box and whisker plots display intensities per nucleus of SOX2 (left) and OCT4 (right) and RNAPII-S5P (bottom). Green line indicates the average intensity at each time point, black line indicates the median intensity. Boxes indicate interquartile range of intensity values, whiskers indicate the 10th and 90th percentiles, and outliers are shown as black dots. Images were collected from at least three biological replicate samples and  $\geq 100$  nuclei were quantified for each. No significant differences were observed in the intensity of these proteins during this time frame. D) Immunoblot of the nuclear and cytoplasmic fractions confirmed that SOX2 and OCT4 are exclusively nuclear in ES cells.

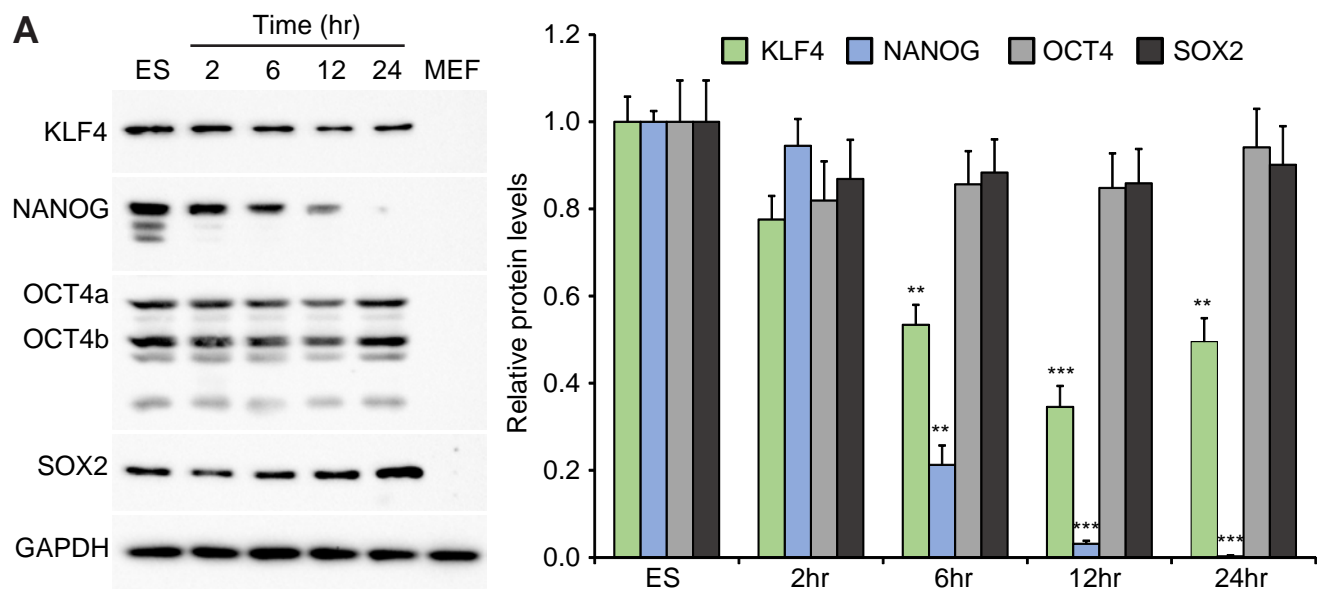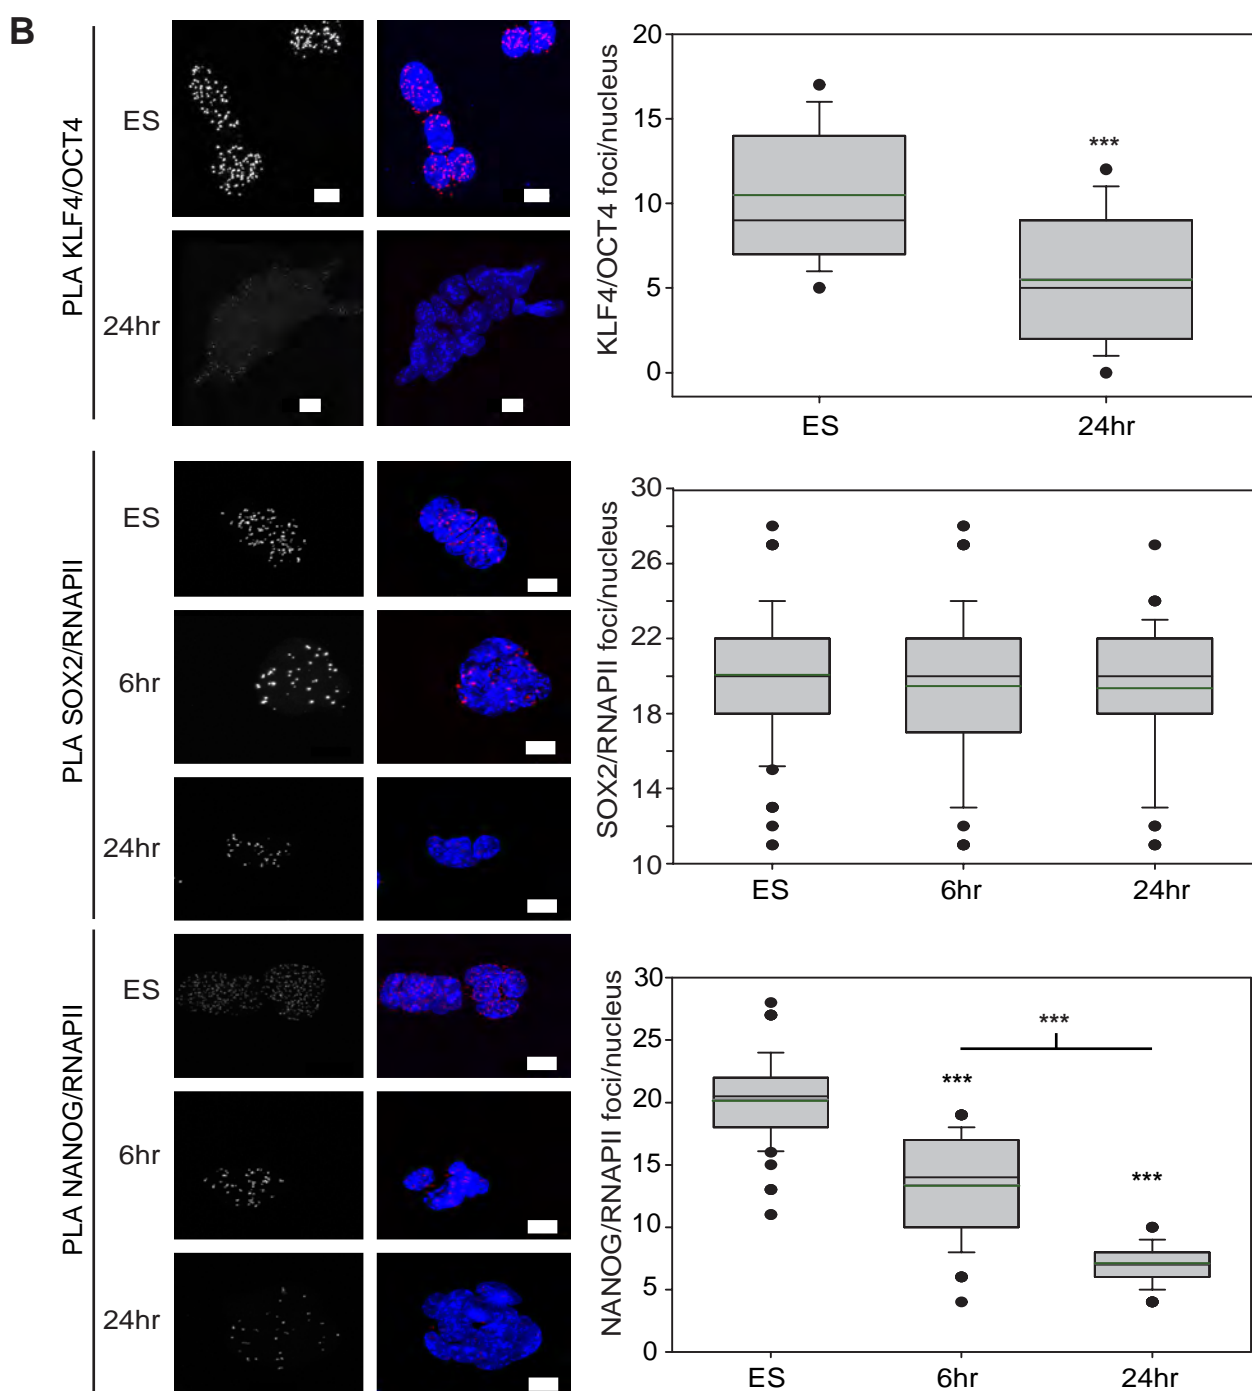

**Figure S2: Changes in nuclear protein complexes associated with pluripotency exit. Related to Figure 2.** A) Immunoblot analysis of total protein isolated from ES cells cultured with LIF/2i (ES) and cells 2, 6, 12 and 24hr after LIF/2i removal is shown on the left. GAPDH levels were monitored to evaluate protein loading. Mouse embryonic fibroblasts (MEF) were used as a negative control for the expression of the pluripotency transcription factors. On the right quantification from three biological replicates is shown as the average relative intensity for each protein compared to GAPDH. Whereas NANOG levels are dramatically reduced at 24hr compared to undifferentiated cells KLF4 levels are only reduced to about 50% compared to undifferentiated cells. Statistical differences compared to the undifferentiated ES cell values are indicated by \*\*  $P < 0.01$  and \*\*\*  $P < 0.001$ . Error bars represent standard deviation. B) Proximity ligation amplification (PLA) indicating the amount of interaction between KLF4/OCT4, SOX2/RNAPII-S5P and NANOG/RNAPII-S5P in ES cells after LIF/2i withdrawal. Scale bar = 10 $\mu$ m. Quantification of the number of interaction foci per nucleus is shown to the right. Box and whisker plots display the number of PLA foci per nucleus. Boxes indicate interquartile range of intensity values, whiskers indicate the 10th and 90th percentiles, outliers in the 5th and 95th percentiles are shown as black dots. Images were collected from at least three biological replicate samples and  $\geq 100$  nuclei were quantified for each. Statistical differences are indicated by \*\*\*  $P < 0.001$ .

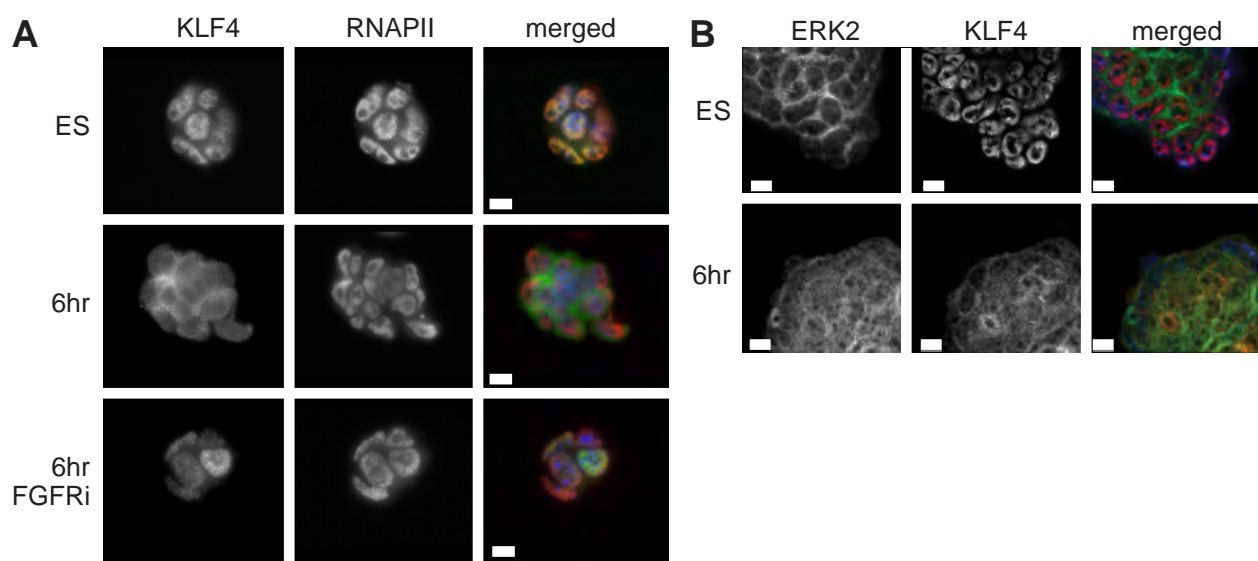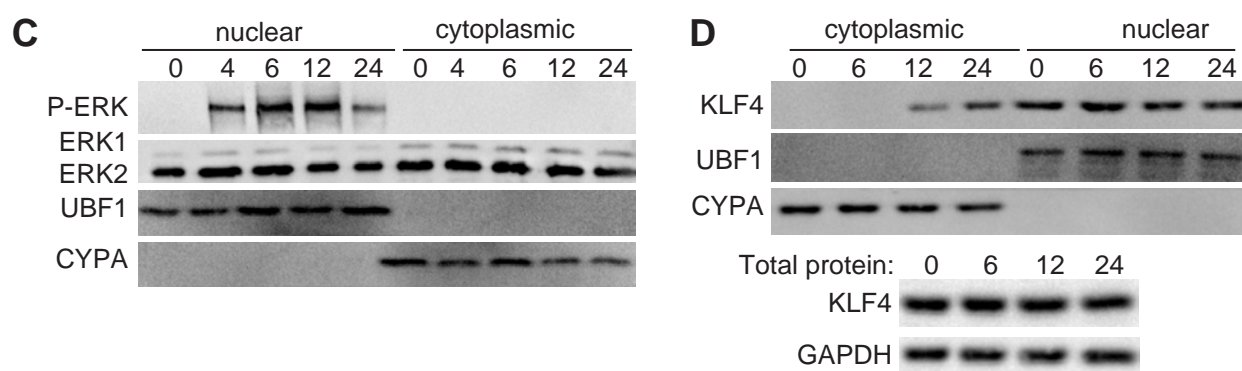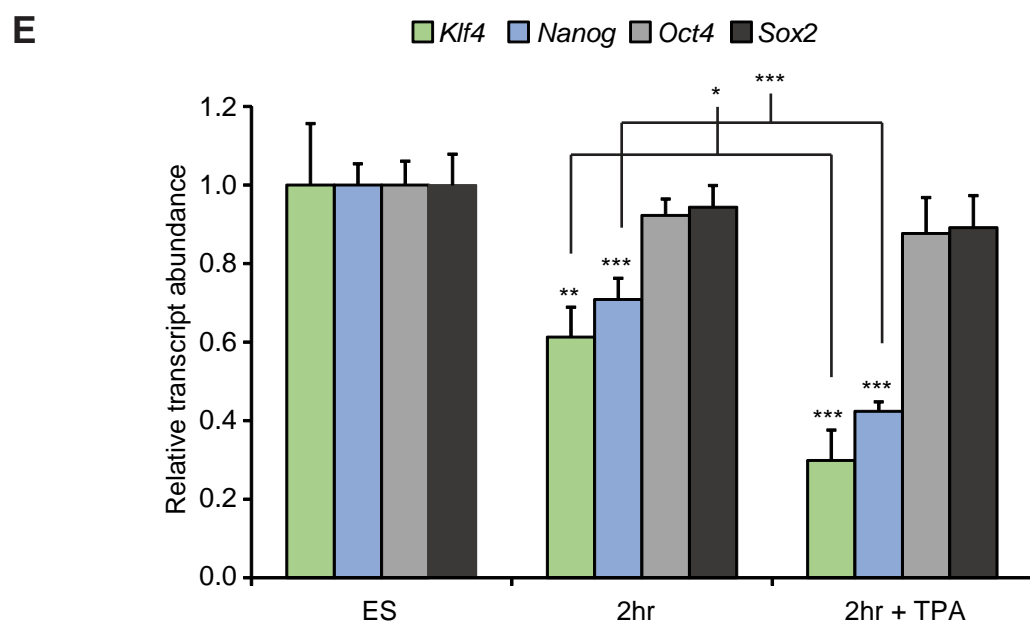

**Figure S3: Signaling mechanisms regulating KLF4 nuclear export. Related to Figure 3.** A) Immunofluorescence images of ES cells cultured with LIF/2i and ES cells 6hr after LIF/2i removal or after 6hr of LIF/2i removal in the presence of the FGFR inhibitor (FGFRi, PD173074). Merged images display KLF4 in green, RNAPII-S5P in red and DAPI in blue. Scale bar = 10 $\mu$ m. B) Removal of LIF/2i causes ERK2 to accumulate in the nucleus concurrently with KLF4 nuclear exit. Immunofluorescence images of ES cells cultured with LIF/2i and ES cells 6hr after LIF/2i removal. Merged images display KLF4 in red, ERK2 in green and DAPI in blue. Scale bar = 10 $\mu$ m. C) Immunoblot analysis from nuclear and cytoplasmic fractions of ES cells cultured with LIF/2i (0) and ES cells 4, 6, 12 and 24hr after LIF/2i removal. D) Immunoblot analysis from nuclear and cytoplasmic fractions of ES cells, and total protein from ES cells cultured with LIF (0) and ES cells 6, 12 and 24hr after LIF removal. E) TPA treatment causes greater decrease in *Klf4* and *Nanog* mRNA 2hr after LIF/2i withdrawal. The average of three biological replicates are normalized to the levels observed in undifferentiated ES cells and GAPDH. Statistical differences compared to the undifferentiated cells or the 2hr differentiated cells are indicated by \*  $P < 0.05$ , \*\*  $P < 0.01$ , \*\*\*  $P < 0.001$ . Error bars represent standard deviation.

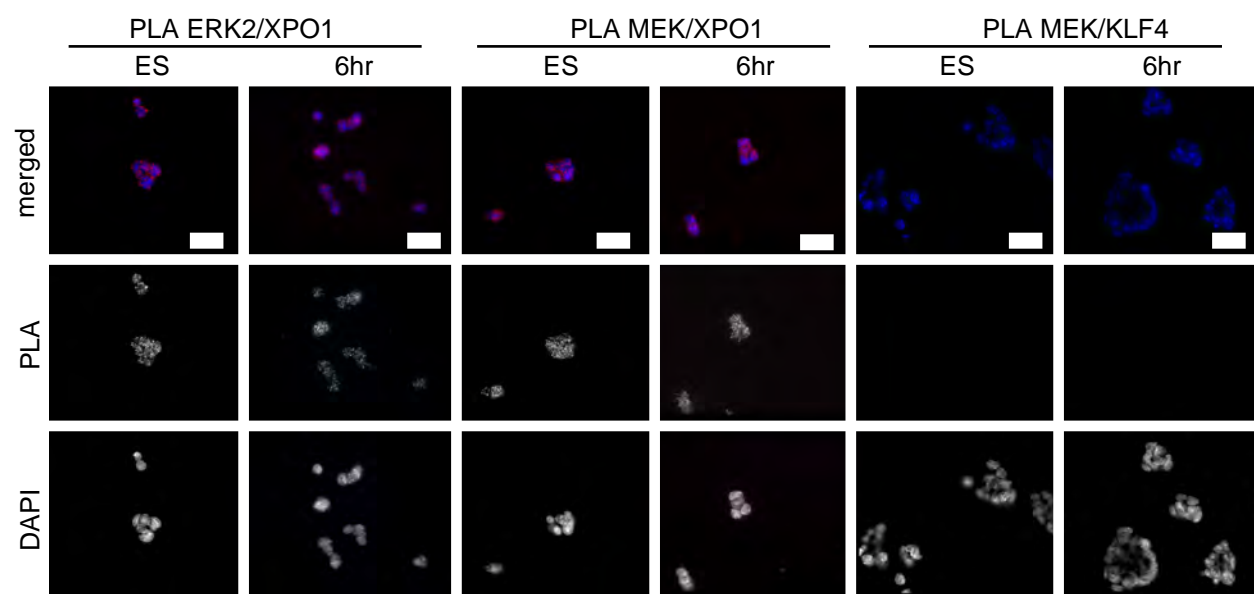

**Figure S4: KLF4 interacts with XPO1 independently of MEK. Related to Figure 4.** PLA in undifferentiated and 6hr differentiated ES cells revealed interaction between ERK2/XPO1 and MEK/XPO1 in both conditions but no interaction between KLF4 and MEK in either condition. Scale bar = 25 $\mu$ m.

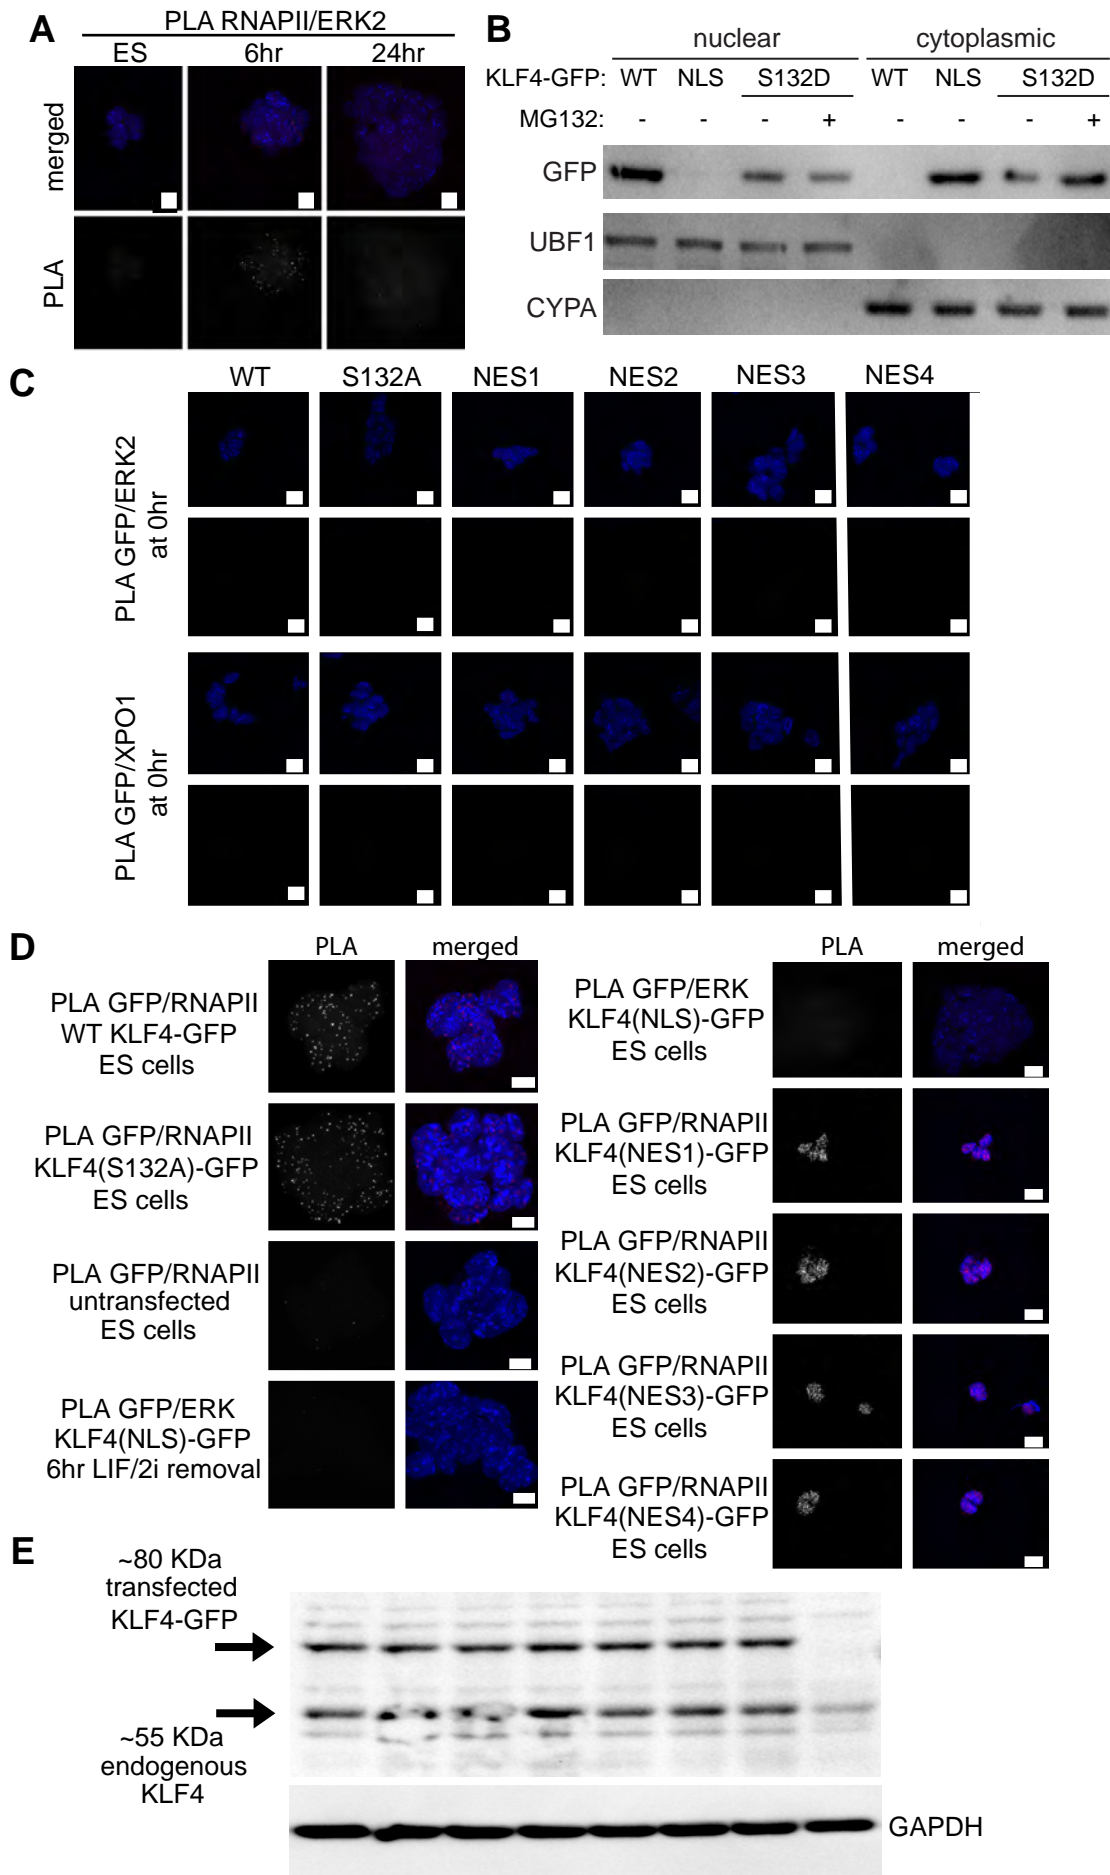

**Figure S5: Supplemental data related to Figure 5.** A) PLA indicating the interaction between ERK2 and RNAPII-S5P in ES cells and 6 or 24hr after LIF/2i withdrawal. Images shown are maximum intensity projections. Scale bar = 10µm. B) Nuclear and cytoplasmic fractions prepared from ES cells expressing WT KLF4-GFP or KLF4-GFP mutants maintained in LIF/2i. Anti-GFP immunoblot indicated the S132D phosphomimetic is exported to the cytoplasm in LIF/2i. Treatment with the proteasome inhibitor MG132 prevents degradation of cytoplasmic KLF4(S132D)-GFP. C) PLA indicating no interaction between any KLF4-GFP (WT or indicated mutants) and ERK2 or XPO1 in ES cells maintained in LIF/2i. Scale bar = 10µm. D) PLA controls in KLF4-GFP transfected cells. PLA for GFP/RNAPII-S5P in WT KLF4-GFP expressing cells and KLF4(S132A)-GFP, KLF4(NES1, 2, 3, 4)-GFP expressing cells indicates that these mutations do not affect participation of KLF4 in RNAPII complexes. NLS mutation does affect KLF4 nuclear localization and interaction with RNAPII. PLA for GFP/ERK in cells expressing mutant KLF4(NLS)-GFP 6hr after LIF/2i removal indicates the NLS is required for KLF4/ERK interaction. Scale bar = 10µm. E) Immunoblot from ES cell lines shown from left to right with stable integration of mutant KLF4(NES4)-GFP, KLF4(NES3)-GFP, KLF4(NES2)-GFP, KLF4(NES1)-GFP, KLF4(NLS)-GFP, KLF4(S132A)-GFP, or WT KLF4-GFP and untransfected ES cells. KLF4 detection identifies the endogenous and the transfected KLF4-GFP proteins. GAPDH levels indicate relative protein amounts in each lane.

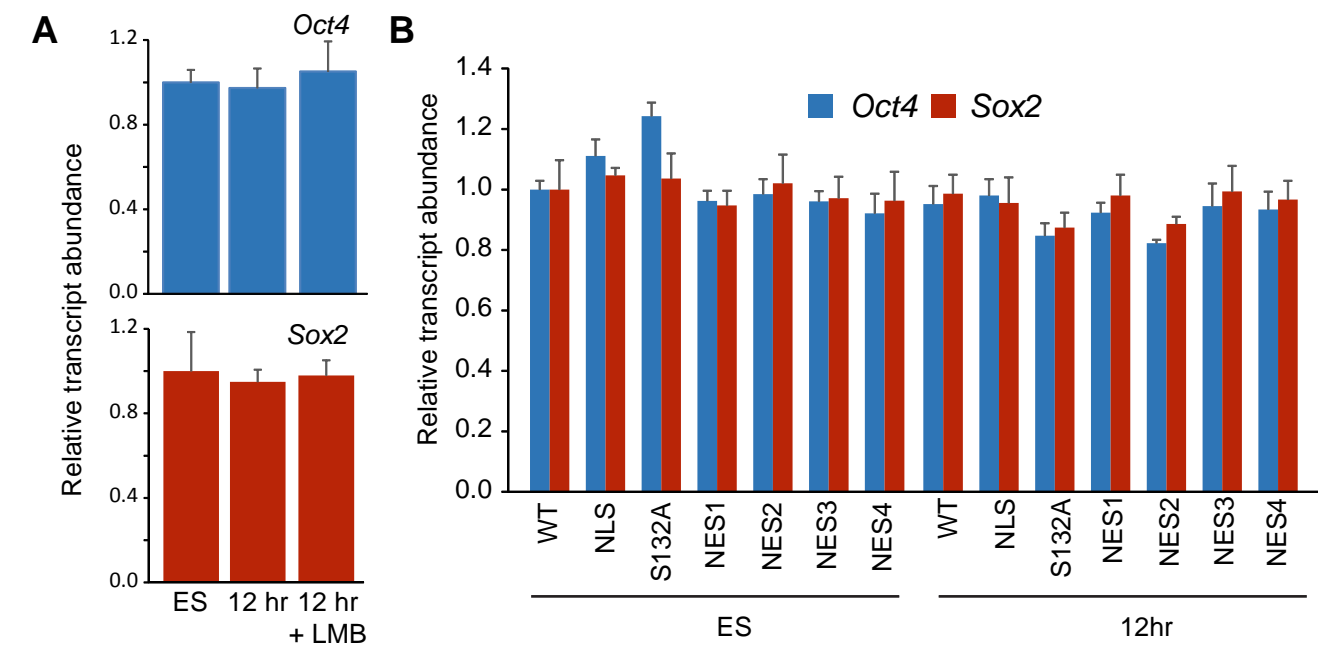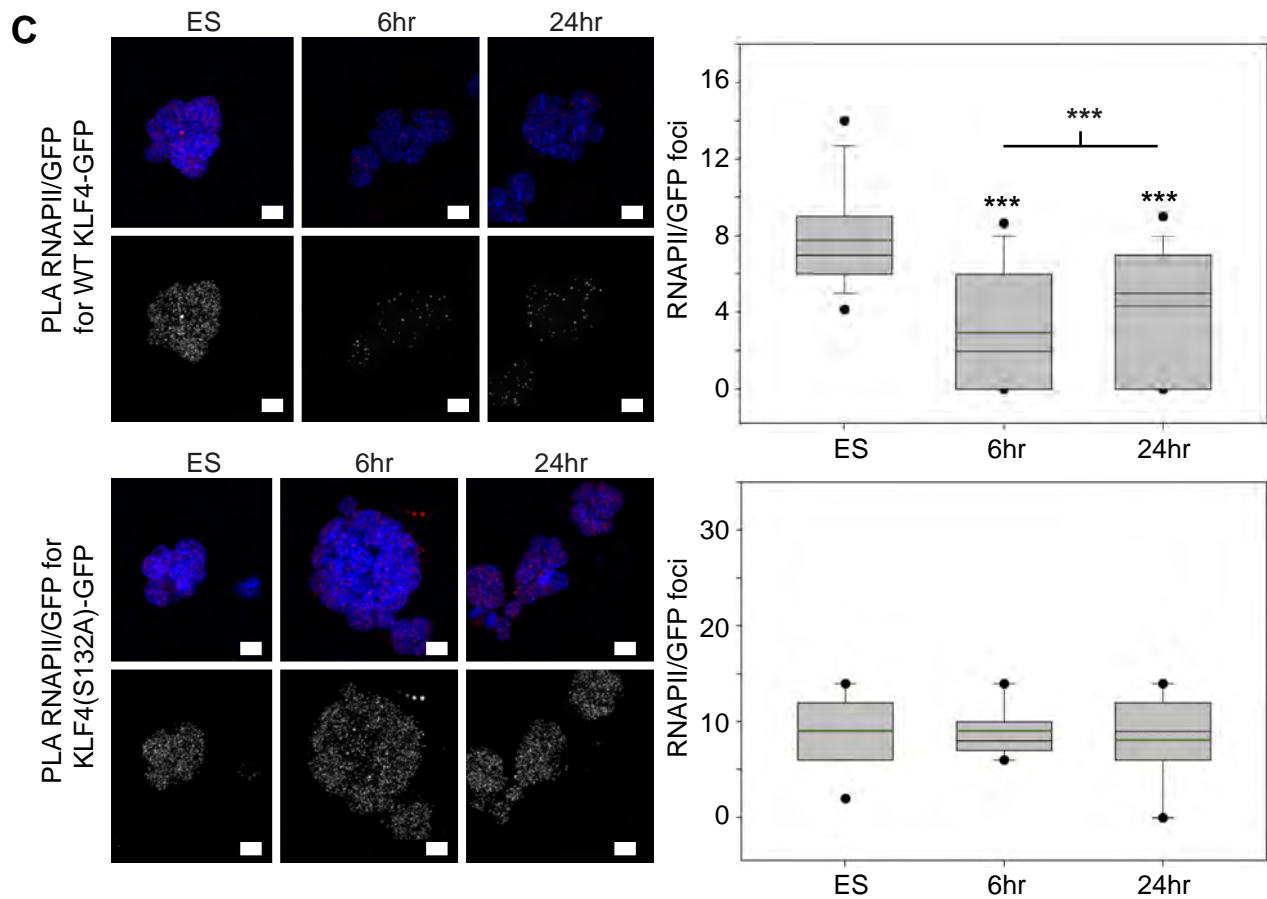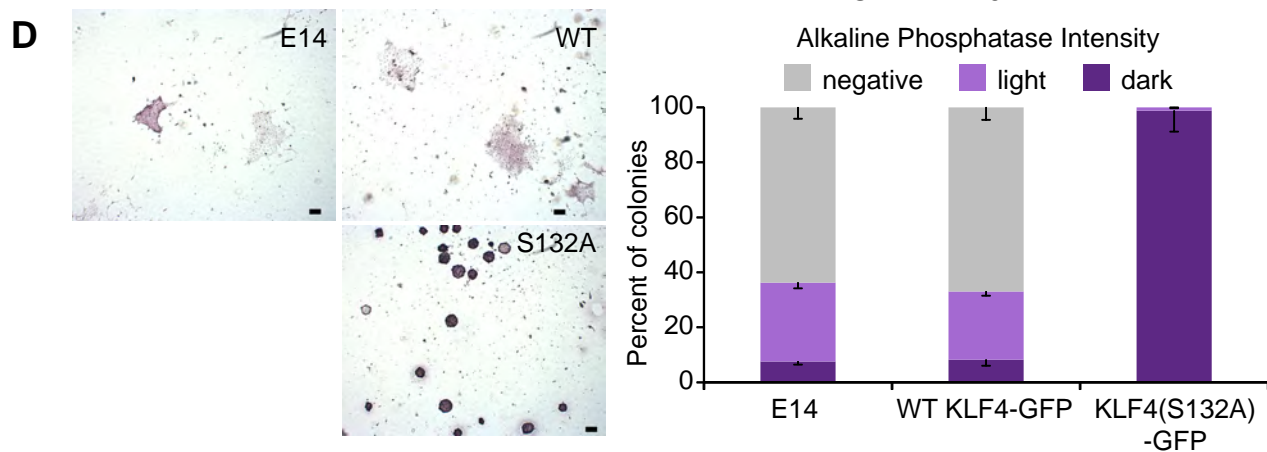

**Figure S6: Expression of KLF4(S132A) blocks ES cell differentiation. Related to Figure 6.**

A) Treatment with 5µg/ml LMB does not affect *Oct4* or *Sox2* transcript abundance. Average data from three biological replicates are normalized to the levels observed in undifferentiated ES cells. Error bars represent standard deviation. B) Relative transcript abundance of *Oct4* and *Sox2* is not affected by 12hr of LIF/2i removal in WT KLF4-GFP, KLF4(NLS)-GFP, KLF4(S132A)-GFP, KLF4(NES1)-GFP, KLF4(NES2)-GFP, KLF4(NES3)-GFP, or KLF4(NES4)-GFP. Average data from three biological replicates are normalized to the levels observed in undifferentiated ES cells expressing WT KLF4-GFP. Error bars represent standard deviation. C) The reduction in KLF4/RNAPII interaction during differentiation depends on KLF4 nuclear export. Proximity ligation amplification (PLA) indicating the interaction between WT KLF4-GFP and RNAPII-S5P or KLF4(S132)-GFP and RNAPII-S5P in ES cells and 6 or 24hr after LIF/2i withdrawal is shown on the left. Images shown are maximum intensity projections. Scale bar = 10µm. On the right box and whisker plots display the number of PLA foci per nucleus. Boxes indicate interquartile range of intensity values, whiskers indicate the 10th and 90<sup>th</sup> percentiles, outliers in the 5th and 95th percentiles are shown as black dots. Images were collected from at least three biological replicate samples and ≥100 nuclei were quantified for each. Statistical differences are indicated by \*\*\*  $P < 0.001$ . D) Alkaline phosphatase staining of untransfected E14, WT KLF4-GFP, or KLF4(S132A)-GFP colonies 5 days after LIF/2i removal. Scale bar = 50µm. Positive and negative colonies were counted from at least three replicates for each revealing that expression of WT KLF4-GFP does not block differentiation whereas expression of the S132A mutant does. Error bars represent standard deviation.

**A**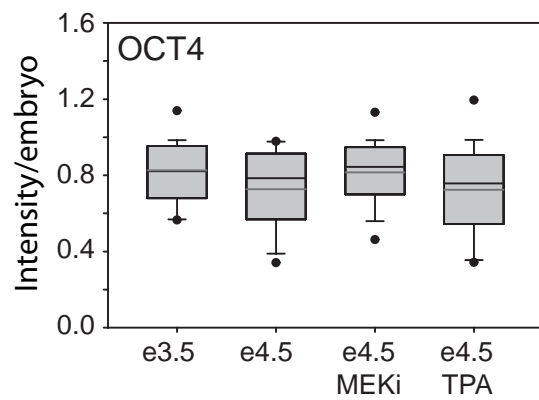**B**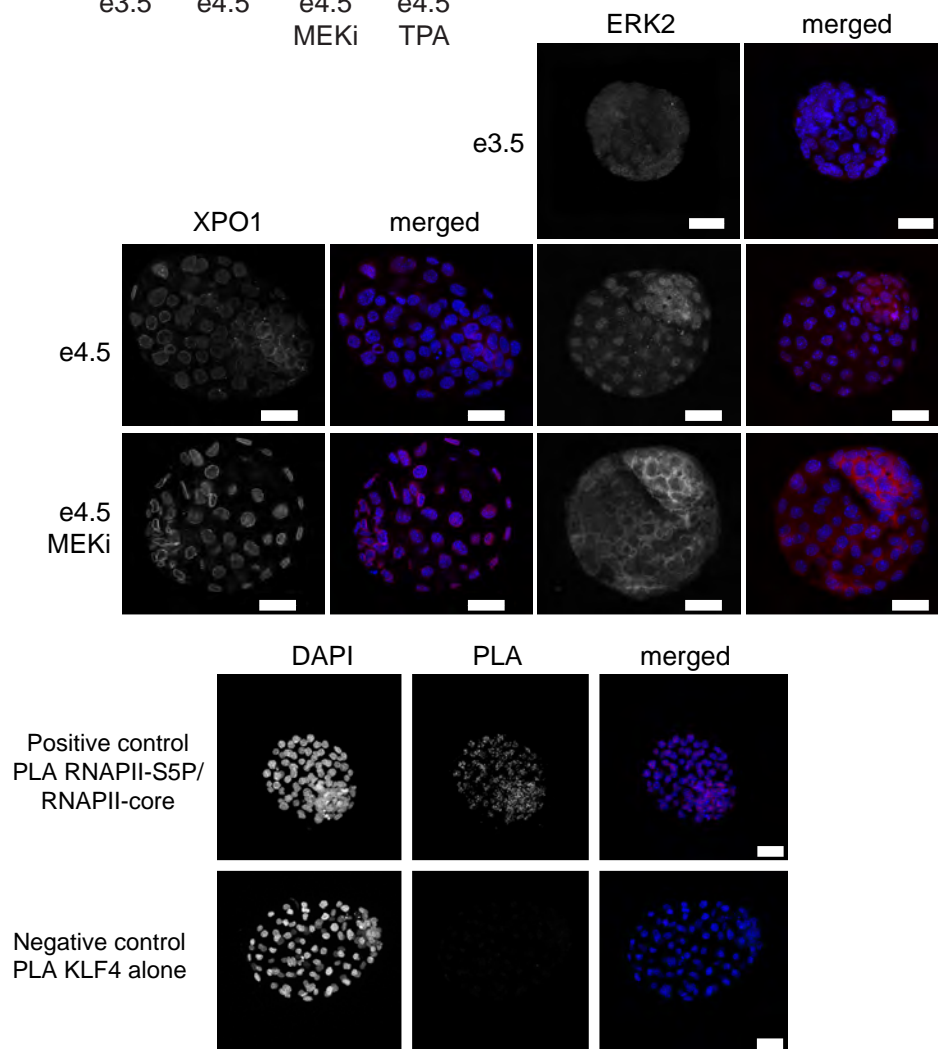**C**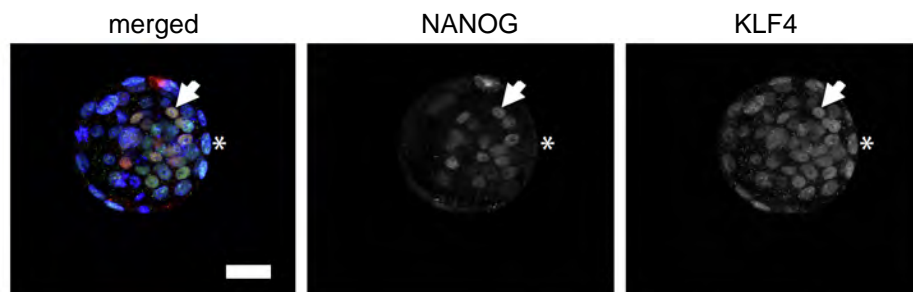

**Figure S7: Proximity ligation amplification and immunostaining controls in mouse embryos. Related to Figure 7.** A) Quantification of immunofluorescence images from at least 30 embryos in each group reveal no significant change in OCT4 protein levels. B) XPO1 and ERK2 immunofluorescence at the indicated embryonic day and PLA control experiments. Scale = 25 $\mu$ m. As a positive control proximity ligation amplification (PLA) was conducted with anti-RNAPII-S5P and anti-RNAPII-core. As a negative control PLA was conducted with the anti-KLF4 antibody alone followed by both the anti-mouse and anti-rabbit oligo linked secondary antibodies. Embryos shown are at embryonic day 4.5. C) Immunofluorescence image of an e3 mouse blastocyst. KLF4 is detectable in both NANOG positive cells (arrow) and NANOG negative outer cells (\*). Images shown are maximum intensity projections. Merged images display DAPI in blue NANOG in red and KLF4 in green. Scale bar = 25 $\mu$ m.

**Table S1: Antibody list**

| <b>Name</b>                    | <b>Company</b>           | <b>Catalog #</b> | <b>Experiment</b>                         |
|--------------------------------|--------------------------|------------------|-------------------------------------------|
| rabbit anti-KLF4               | Abcam                    | AB129473         | IF, PLA, WB, IP, Embryo IF and PLA        |
| mouse anti-KLF4                | Santa Cruz               | sc-393462        | IF, PLA, IP-WB, Embryo IF and PLA         |
| rabbit anti-NANOG              | Cosmo Bio                | RCAB0002 P-F     | IF, PLA, WB                               |
| rabbit anti-NANOG              | Abcam                    | AB80892          | Embryo IF                                 |
| mouse anti-NANOG               | BD Biosciences           | 560259           | PLA, Embryo IF                            |
| mouse anti-SOX2                | R&D Systems              | MAB2018          | IF, PLA                                   |
| mouse anti-OCT3/4              | Santa Cruz               | sc-5279          | IF, PLA, Embryo IF                        |
| mouse anti-RNAPII-PS5          | Abcam                    | AB5408           | IF, PLA                                   |
| rabbit anti-RNAPII-PS5         | Abcam                    | AB5131           | IF, PLA, Embryo PLA                       |
| mouse anti-RNAPII core (ARNA3) | Millipore Sigma          | CBL221           | PLA, Embryo PLA                           |
| rabbit anti-ERK1               | Santa Cruz               | sc-093           | WB                                        |
| rabbit anti-ERK2               | Santa Cruz               | sc-154           | IF, PLA, WB, IP, IP-WB, Embryo IF and PLA |
| rabbit anti-ERKpTEpY           | Promega                  | V8031            | WB                                        |
| mouse anti-XPO1 (CRM1)         | Santa Cruz               | sc-74454         | IF, PLA, IP-WB, Embryo IF and PLA         |
| mouse anti-GFP                 | Thermo Fisher Scientific | A11121           | IF, PLA                                   |
| rabbit anti-GFP                | Origene                  | TA150071         | PLA                                       |
| chicken anti-GFP               | Abcam                    | AB13970          | WB                                        |
| goat anti-rabbit A488          | Thermo Fisher Scientific | A-11034          | IF                                        |
| goat anti-mouse A594           | Thermo Fisher Scientific | A11032           | IF                                        |
| rabbit anti-CYPA               | Abcam                    | AB131334         | WB                                        |
| rabbit anti-UBF1               | Santa Cruz               | sc-13125         | WB                                        |
| mouse anti-GAPDH               | Santa Cruz               | sc-365062        | WB                                        |
| goat anti-rabbit-HRP           | Bio-Rad                  | 170-6515         | WB                                        |
| goat anti-mouse-HRP            | Bio-Rad                  | 170-6516         | WB                                        |
| mouse anti-phosphoserine       | Abcam                    | AB9332           | IP-WB                                     |

**Table S2: Primer list**

| <b>Gene</b>  | <b>Forward primer</b> | <b>Reverse primer</b>   | <b>Amplicon size</b> |
|--------------|-----------------------|-------------------------|----------------------|
| <i>Klf4</i>  | GAAGACGAGGATGAAGCTGAC | TGGACCTAGACTTTATCCTTTCC | 94bp                 |
| <i>Nanog</i> | TCCCAAACAAAAGCTCTCAAG | ATCTGCTGGAGGCTGAGGTA    | 165bp                |
| <i>Sox2</i>  | ACGCCTTCATGGTATGGTC   | CGGACAAAAGTTTCCACTC     | 114bp                |
| <i>Oct4</i>  | ATGAGGCTACAGGGACACCTT | GTGAAGTGGGGGCTTCCATA    | 100bp                |
| <i>Gapdh</i> | GCACCAGCATCCCTAGACC   | CTTCTTGTGCAGTGCCAGGTG   | 109bp                |

**Table S3: Site directed mutagenesis primer list**

| <b>Primer name</b> | <b>Sequence</b>                                       |
|--------------------|-------------------------------------------------------|
| S132A forward      | CCACCTCGGCGTCAGCTTCATCCTCGTCTGCCCCAGCGAGCAGCGGCCCTGCC |
| S132A reverse      | GGCAGGGCCGCTGCTCGCTGGGGCAGACGAGGATGAAGCTGACGCCGAGGTGG |
| NLS forward        | CGGGGCCACGACCCGCTCCGCTCTTTGGCTTGG                     |
| NLS reverse        | CCAAGCCAAAGAGCGGAAGCGGGTCGTGGCCCCG                    |
| NES1 forward       | AAAGGATAAAGTCTAGGTCCTGTTGGTCGTTGAACTCCTCGGTC          |
| NES1 reverse       | GACCGAGGAGTTCAACGACCAACAGGACCTAGACTTTATCCTTT          |
| NES2 forward       | GTGGTCACGGTGCCGCCACCGATTCT                            |
| NES2 reverse       | AGGAATCGGTGGGCGGCACCGTGACCAC                          |
| NES3 forward       | GCCAGGGGTGGTCTGAGACGCCTTCAG                           |
| NES3 reverse       | CTGAAGGCGTCTCAGACCACCCCTGGC                           |
| NES4 forward       | CAAATGGGCCTCTTGGGACCGGCTGAC                           |
| NES4 reverse       | GTCAGCCGGTCCCAAGAGGCCCATTTG                           |
| S132D forward      | TGCTCGCTGGGTCAGACGAGGATGAAGCTGACGC                    |
| S132D reverse      | GCGTCAGCTTCATCCTCGTCTGACCCAGCGAGCA                    |
